# Supplementary material for: Supramolecular helical nanofibers assembled from a pyridinium-functionalized methyl glycyrrhetate amphiphile
Source: Royal Society of Chemistry journal article supplement (doi:10.1039/c5nr03699b), 2015-01-01

## Supporting Information

### Supramolecular helical nanofibers assembled from a pyridinium- functionalized methyl glycyrrhetate amphiphile

Yuxia Gao,<sup>a</sup> Jie Hao,<sup>a</sup> Jindan Wu,<sup>a</sup> Xun Zhang,<sup>a</sup> Jun Hu<sup>\*b</sup> and Yong Ju<sup>\*a</sup>

<sup>a</sup> *Key Laboratory of Bioorganic Phosphorus Chemistry and Chemical Biology, Ministry of Education,*

*Department of Chemistry, Tsinghua University, Beijing 100084, China. E-mail:*

*juyong@tsinghua.edu.cn;*

<sup>b</sup> *State Key Lab of Polymer Physics and Chemistry, Changchun Institute of Applied Chemistry, Chinese*

*Academy of Sciences, Changchun, 130022, China. E-mail: jhu@ciac.ac.cn.*

## Content

|                                                                                                    |   |
|----------------------------------------------------------------------------------------------------|---|
| 1. Synthesis and structure characterization of <b>MGP</b>                                          | 2 |
| 2. Self-assembly behaviors of <b>MGP</b>                                                           | 4 |
| 3. CD spectra of <b>MGP</b> in mixed solvents                                                      | 6 |
| 4. TEM images of <b>MGP</b> under different concentrations                                         | 7 |
| 5. UV-Vis spectra of <b>MGP</b> under different concentrations                                     | 7 |
| 6. Syntheses and structure characterizations of <b>MGBP</b> , <b>C4-MGP</b> ,<br>and <b>C4-MOP</b> | 8 |

## 1. Synthesis and structure characterization of MGP

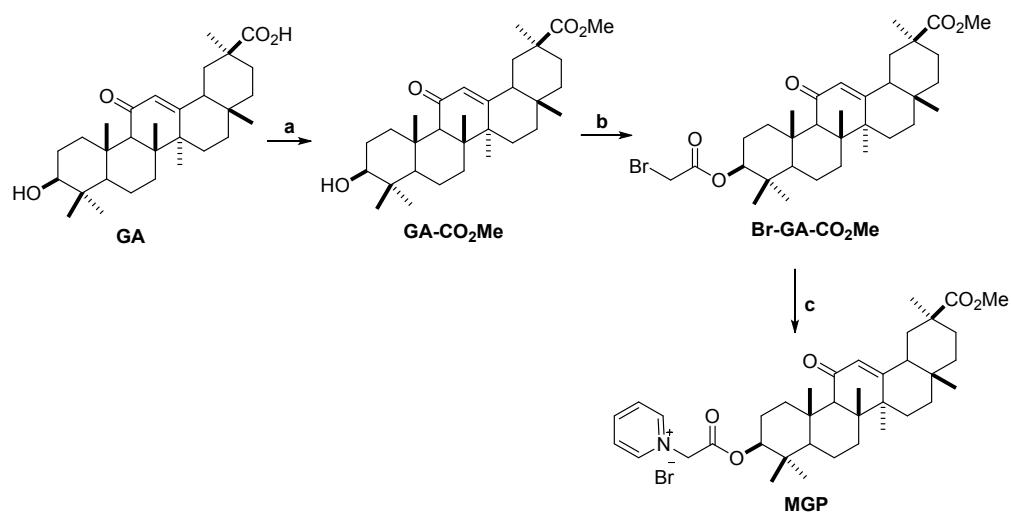

**Scheme S1** (a) CH<sub>3</sub>I, DMF, r.t., 20 h, 98 %; (b) BrCOCH<sub>2</sub>Br, K<sub>2</sub>CO<sub>3</sub>, dry DCM, r.t., 12 h, 90 %; (c) Pyridine, r.t., 10 h, 92 %.

(1) ESI-MS (+) spectrum of MGP

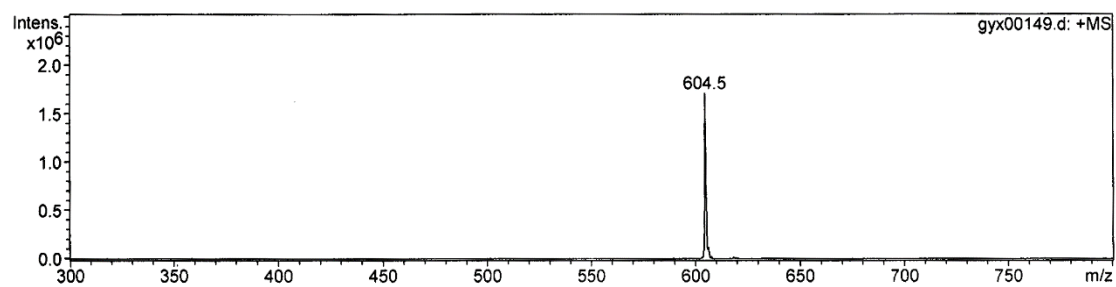

(2) HRMS (ESI) spectrum of **MGP**

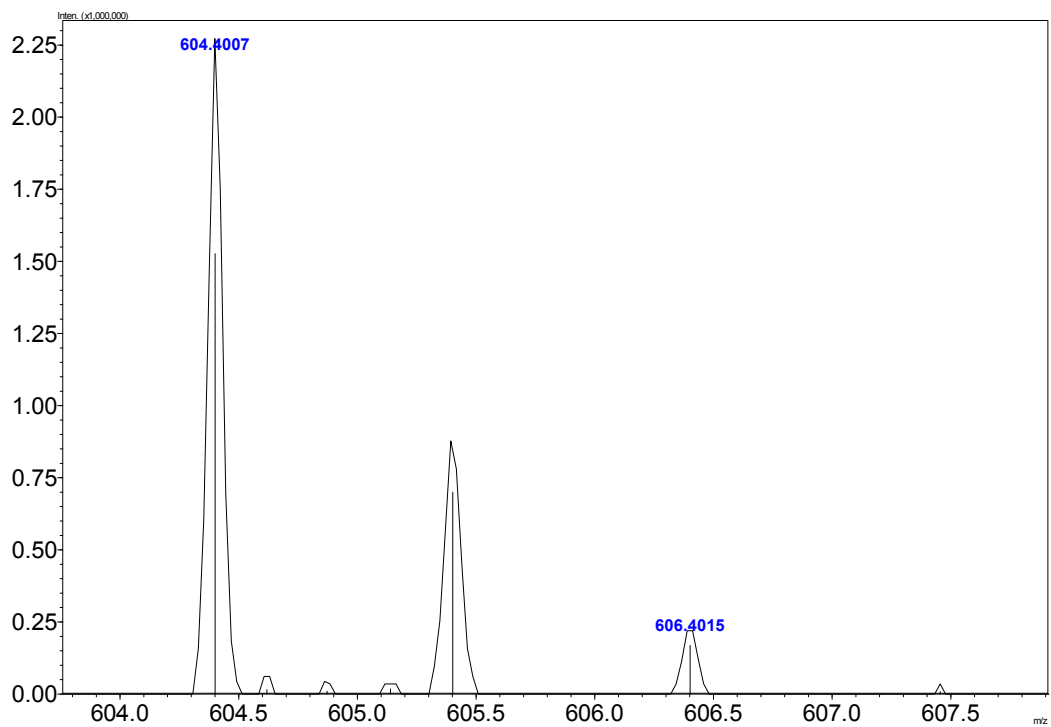

(3)  $^1\text{H}$  NMR spectrum of **MGP** (400 MHz,  $\text{DMSO}-d_6$ )

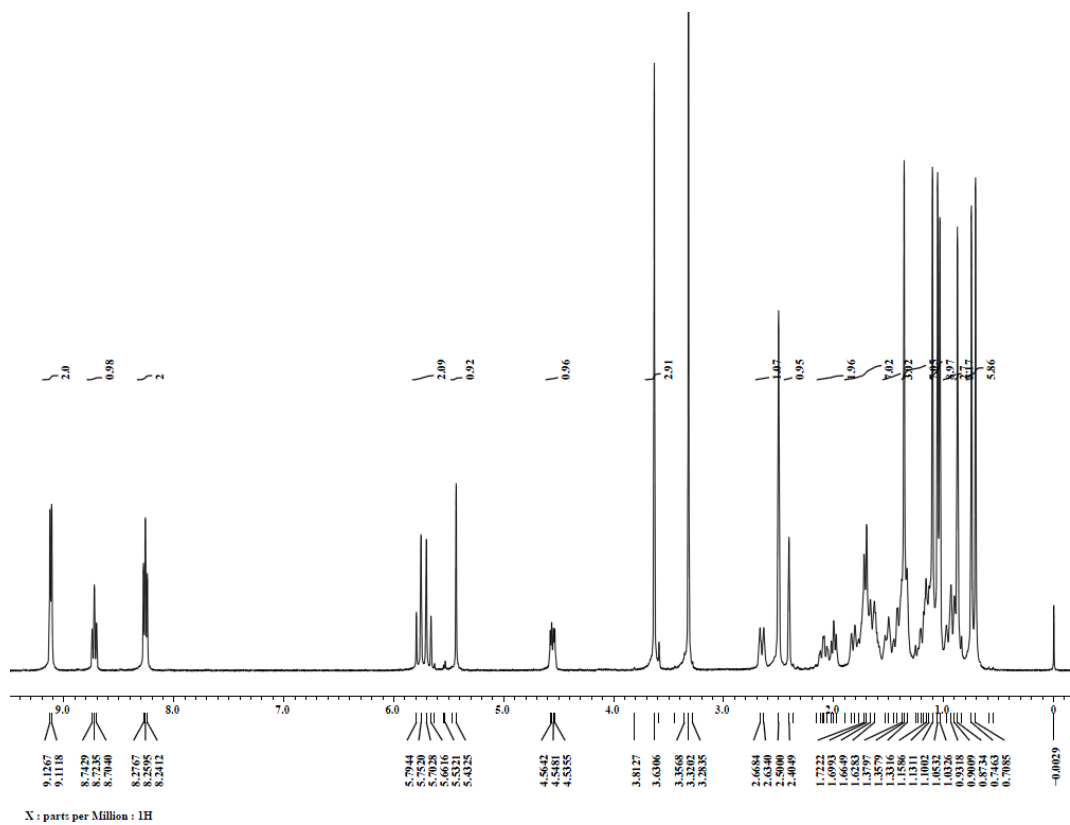

(4)  $^{13}\text{C}$  NMR spectrum of **MGP** (100 MHz,  $\text{CDCl}_3$ )

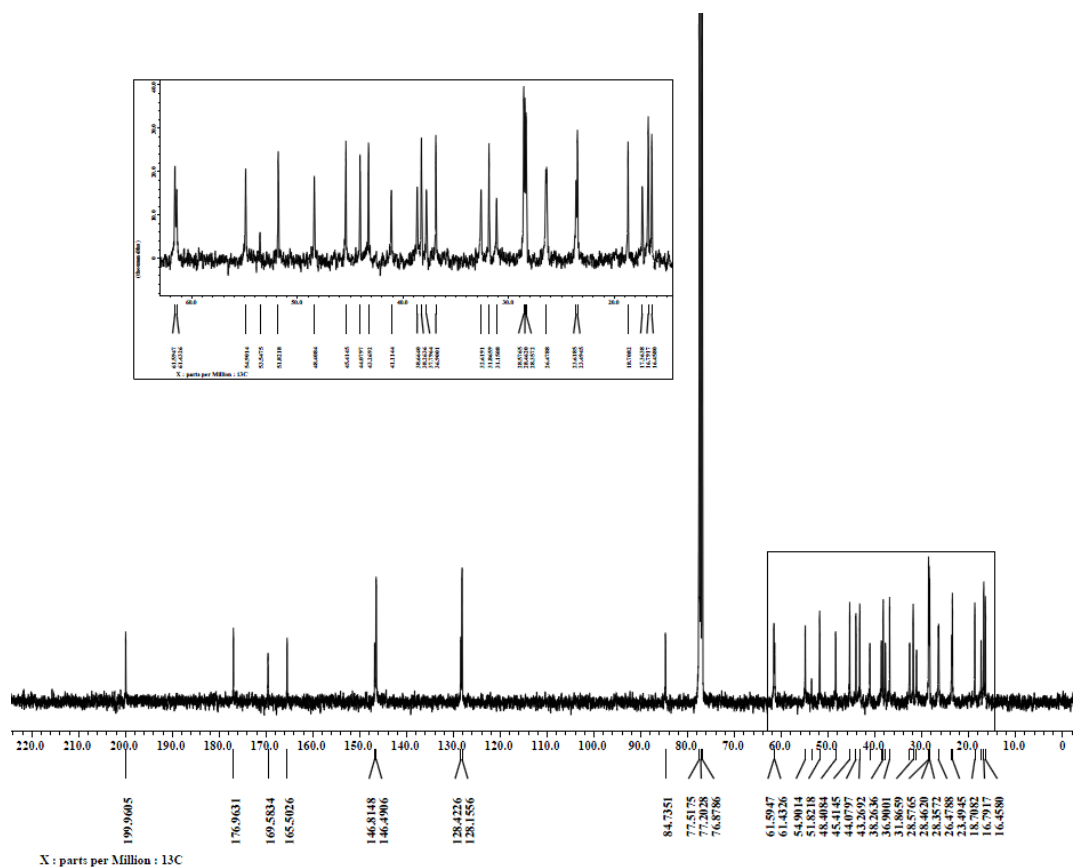

## 2. Self-assembly behaviors of **MGP**

| Entry | Mixed solvents (v/v)                       | MGC ( $\text{mg mL}^{-1}$ ) | State |
|-------|--------------------------------------------|-----------------------------|-------|
| 1     | chloroform/toluene =1:2                    | 1.0                         | Gel   |
| 2     | chloroform/ <i>o</i> -xylene =1:2          | 1.0                         | Gel   |
| 3     | chloroform/ <i>m</i> -xylene =1:2          | 1.0                         | Gel   |
| 4     | chloroform/ <i>p</i> -xylene =1:2          | 1.0                         | Gel   |
| 5     | chloroform/mesitylene =1:2                 | 1.0                         | Gel   |
| 6     | chloroform/chlorobenzene =1:2              | 1.0                         | Gel   |
| 7     | chloroform/bromobenzene =1:2               | 1.0                         | Gel   |
| 8     | chloroform/ <i>o</i> -dichlorobenzene =1:2 | 1.0                         | Gel   |

**Table S1** Self-assembly behaviors of **MGP** in various mixed solvents

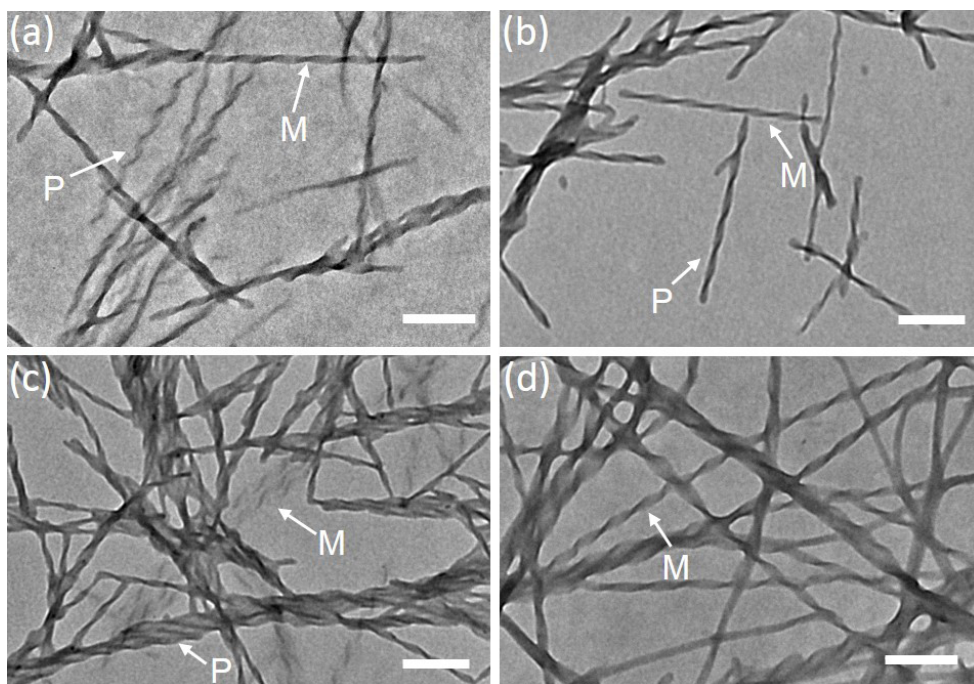

**Fig. S1** TEM images of **MGP** assemblies in other mixed solvents of chloroform and (a) *p*-xylene, (b) chlorobenzene, (c) bromobenzene, (d) toluene (12 mM, chloroform/aromatic solvent = 1:2, v/v). Scale bar is 200 nm.

| Mixed solvents                        | Handedness | Width/nm | Pitch/nm |
|---------------------------------------|------------|----------|----------|
| chloroform/toluene                    | left       | 40       | 124      |
| chloroform/ <i>o</i> -xylene          | right/left | 28       | 121      |
| chloroform/ <i>m</i> -xylene          | right/left | 28       | 117      |
| chloroform/ <i>p</i> -xylene          | right/left | 34       | 124      |
| chloroform/mesitylene                 | left       | 29       | 118      |
| chloroform/chlorobenzene              | right/left | 35       | 120      |
| chloroform/bromobenzene               | right/left | 29       | 126      |
| chloroform/ <i>o</i> -dichlorobenzene | right      | 29       | 115      |

**Table S2** The parameters of helical fibers assembled from **MGP** in different chloroform/aromatic solvents (the width and pitch are average values)

### 3. CD spectra of MGP in mixed solvents

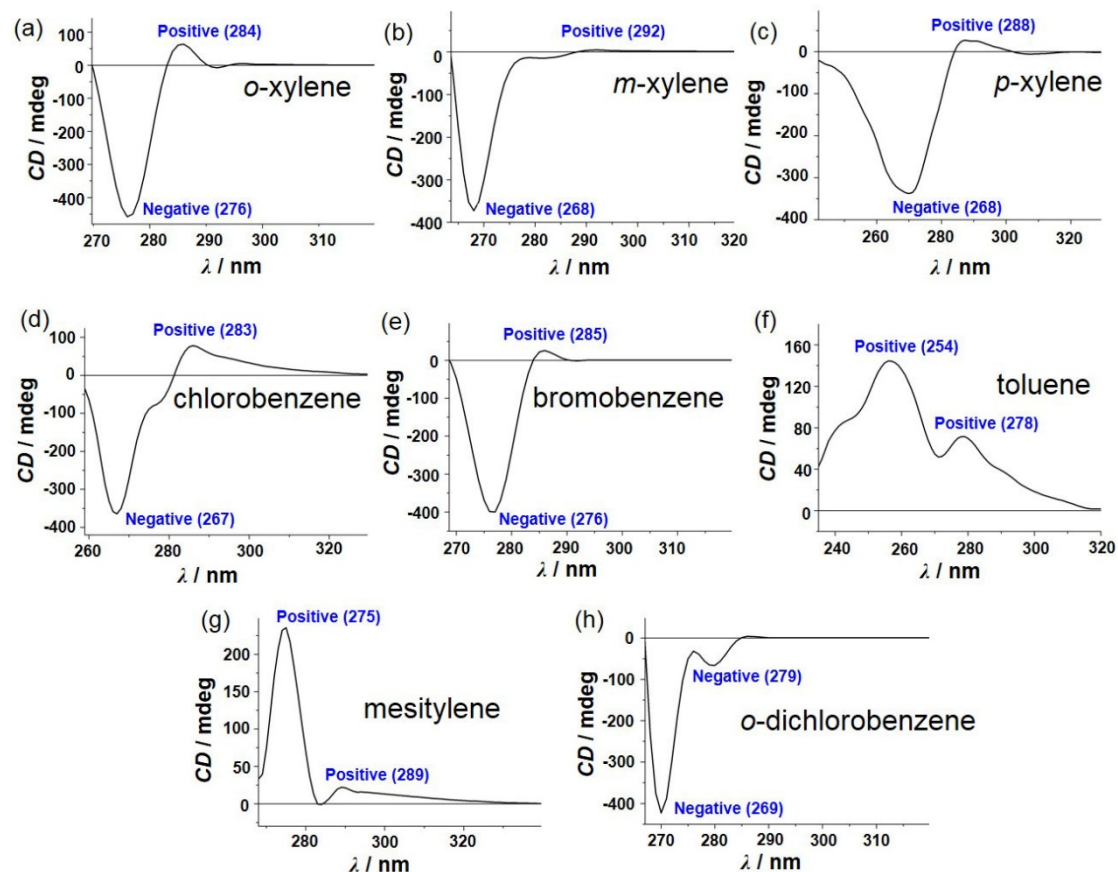

**Fig. S2** CD spectra of **MGP** assemblies in different mixed solvents

(chloroform/aromatic solvent = 1:2, v/v,  $1.5 \times 10^{-3}$  M): (a) *o*-xylene, (b) *m*-xylene, (c) *p*-xylene, (d) chlorobenzene, (e) bromobenzene, (f) toluene, (g) mesitylene, (h) *o*-dichlorobenzene.

#### 4. TEM images of MGP under different concentrations

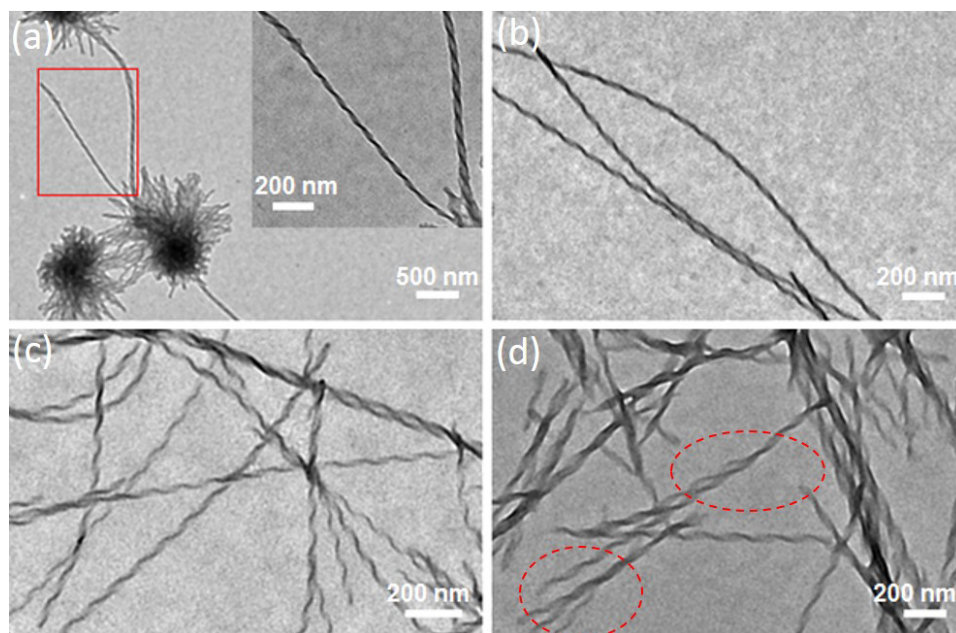

**Fig. S3** TEM images of MGP in chloroform/*o*-xylene (1:2, v/v) under different concentrations. (a) 0.5 mg mL<sup>-1</sup>, PG, insert refers to the magnified field inside the red line; (b) 1.0 mg mL<sup>-1</sup>, G; (c) 3.0 mg mL<sup>-1</sup>, G; (d) 5.0 mg mL<sup>-1</sup>, G, dash circles show the coiling process of the helical fibers. G and PG are the abbreviations of gel and partial gel.

#### 5. UV-Vis spectra of MGP under different concentrations

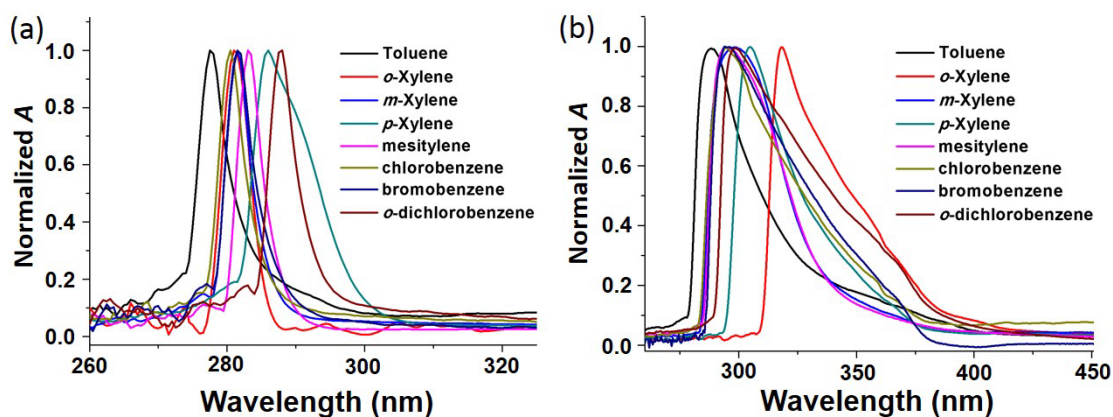

**Fig. S4** Normalized UV-Vis spectra of MGP in mixed solvents (chloroform/aromatic solvent=1:2, v/v) under different concentrations: (a)  $5.0 \times 10^{-5}$  M, (b)  $1.5 \times 10^{-3}$  M.

| Mixed solvents                        | $\lambda_1$ /nm | $\lambda_2$ /nm | $\Delta\lambda$ /nm |
|---------------------------------------|-----------------|-----------------|---------------------|
| chloroform/toluene                    | 277             | 288             | 11                  |
| chloroform/ <i>o</i> -xylene          | 280             | 318             | 38                  |
| chloroform/ <i>m</i> -xylene          | 281             | 297             | 16                  |
| chloroform/ <i>p</i> -xylene          | 285             | 305             | 20                  |
| chloroform/mesitylene                 | 282             | 295             | 13                  |
| chloroform/chlorobenzene              | 280             | 295             | 15                  |
| chloroform/bromobenzene               | 281             | 294             | 13                  |
| chloroform/ <i>o</i> -dichlorobenzene | 287             | 300             | 13                  |

**Table S3** The maximum absorption peaks of **MGP** in each solvent system under different concentrations ( $\lambda_1$ :  $C_1 = 5 \times 10^{-5}$  M,  $\lambda_2$ :  $C_2 = 1.5 \times 10^{-3}$  M,  $\Delta\lambda = \lambda_2 - \lambda_1$ )

## 6. Syntheses and structure characterizations of MGBP, C4-MGP, and C4-MOP

### Synthesis of MGBP

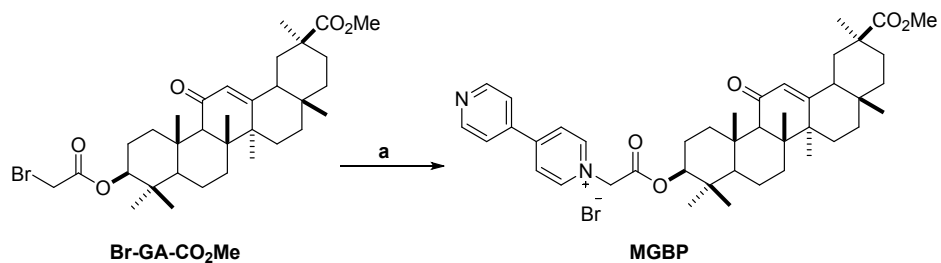

**Scheme S2 (a)** 4, 4'-bipyridine, dry  $\text{CH}_2\text{Cl}_2$ , r.t., 24 h, 75 %.



## MGBP

### (1) ESI-MS (+) spectrum of MGBP

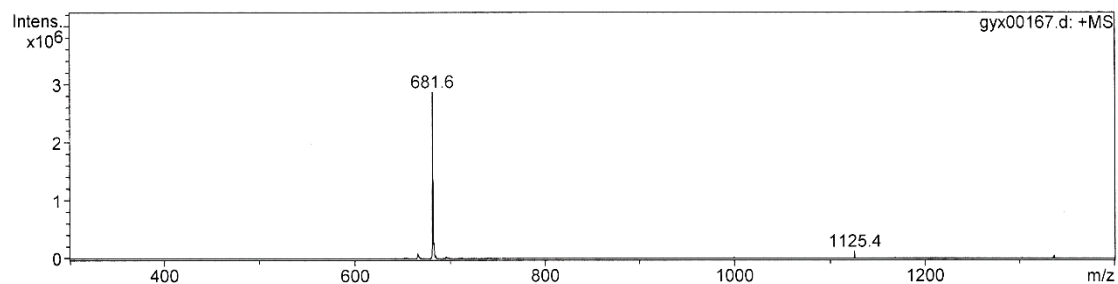

### (2) HRMS (ESI) spectrum of MGBP

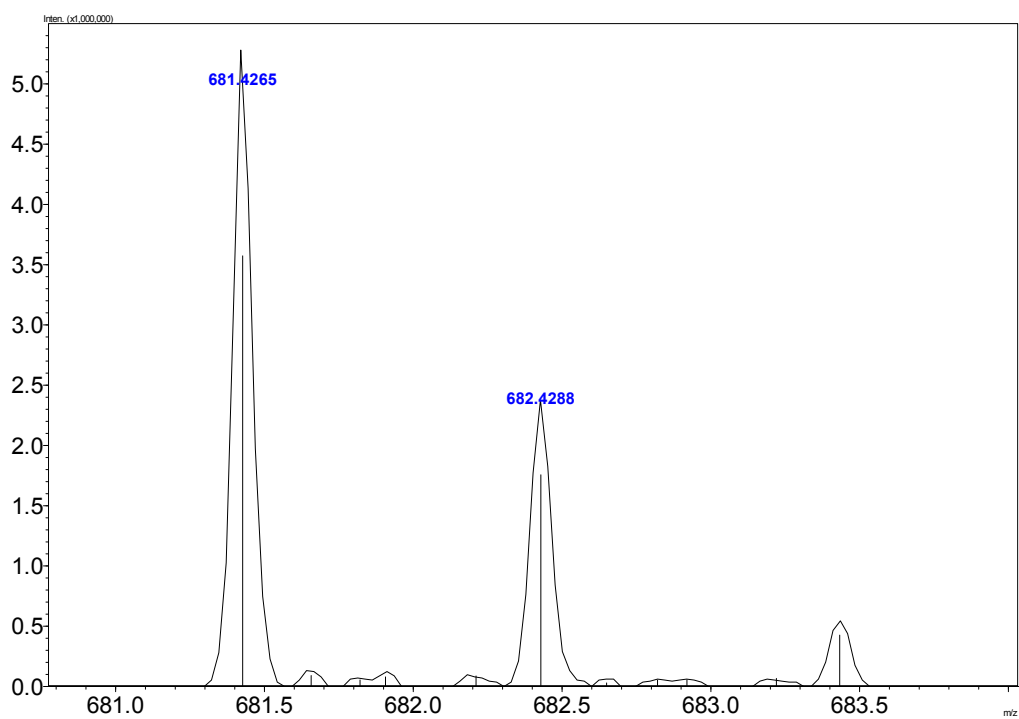

### (3) $^1\text{H}$ NMR spectrum of MGBP (400 MHz, $\text{DMSO-}d_6$ )

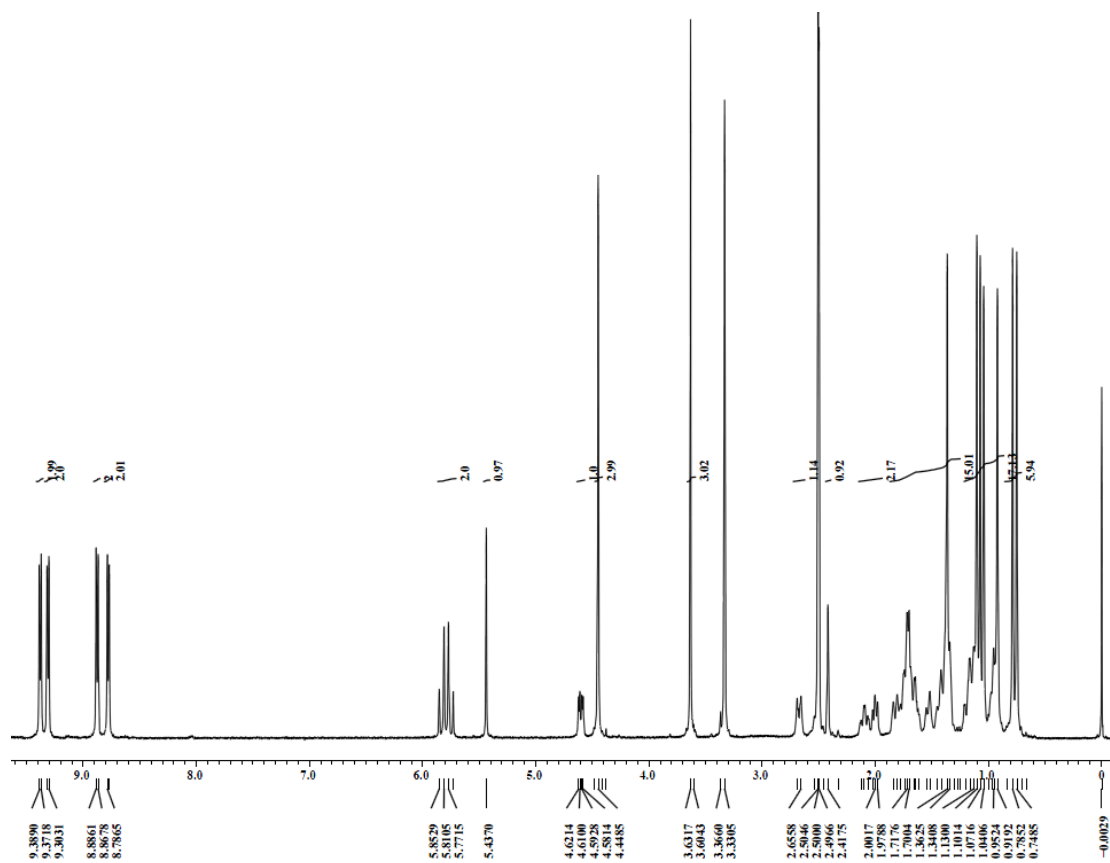

(4)  $^{13}\text{C}$  NMR spectrum of **MGFP** (75 MHz,  $\text{CD}_3\text{OD}$ )

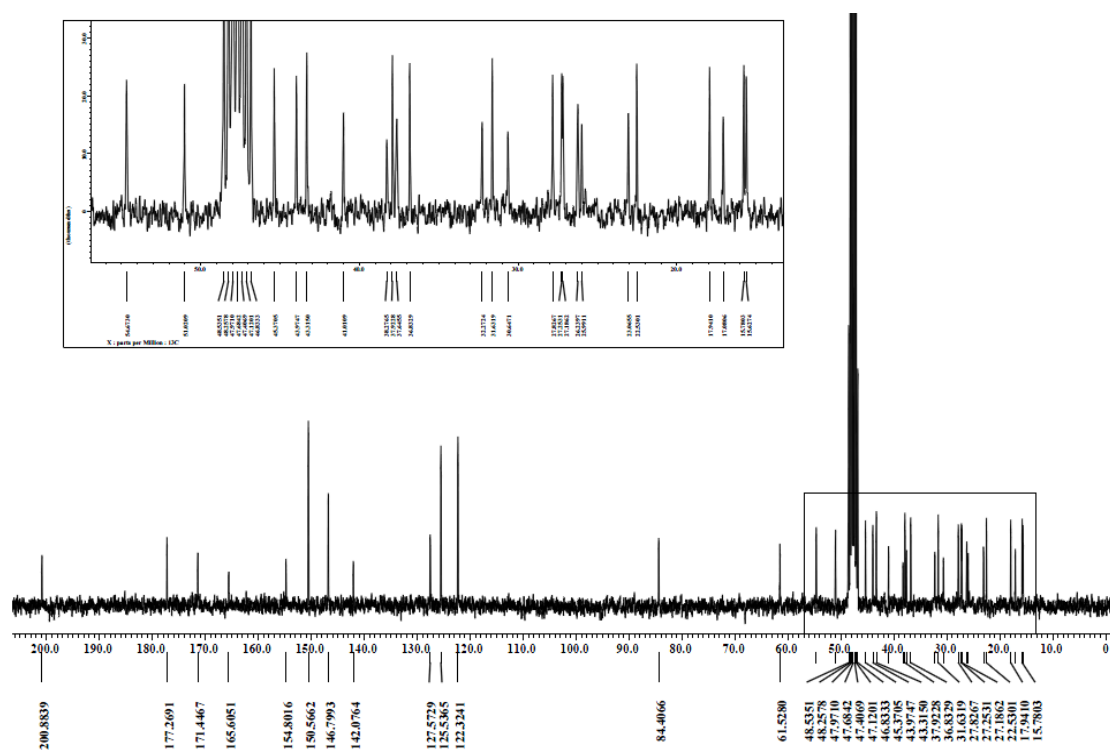

## Synthesis of C4-MGP

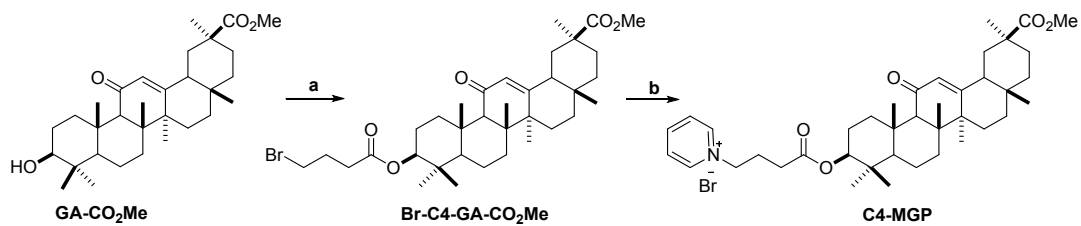

**Scheme S3** (a) 4-Bromobutyric acid, DCC, DMAP, dry CH<sub>2</sub>Cl<sub>2</sub>, r.t., 20 h, 54 %; (b) Pyridine, r.t., 10 h, 64 %.

## Br-C4-GA-CO<sub>2</sub>Me

(1) ESI-MS (+) spectrum of Br-C4-GA-CO<sub>2</sub>Me

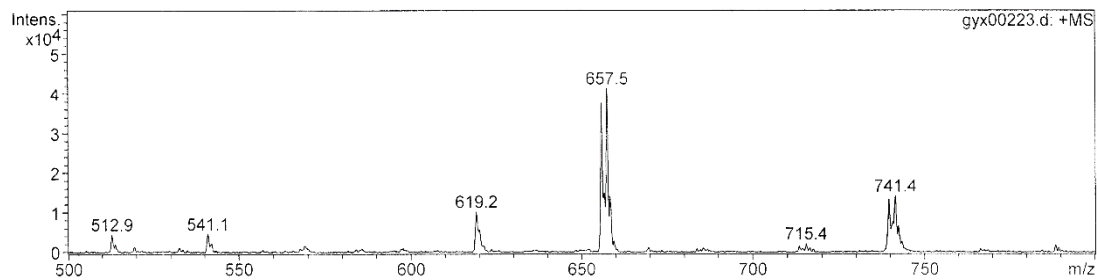

(2) HRMS (ESI) spectrum of Br-C4-GA-CO<sub>2</sub>Me

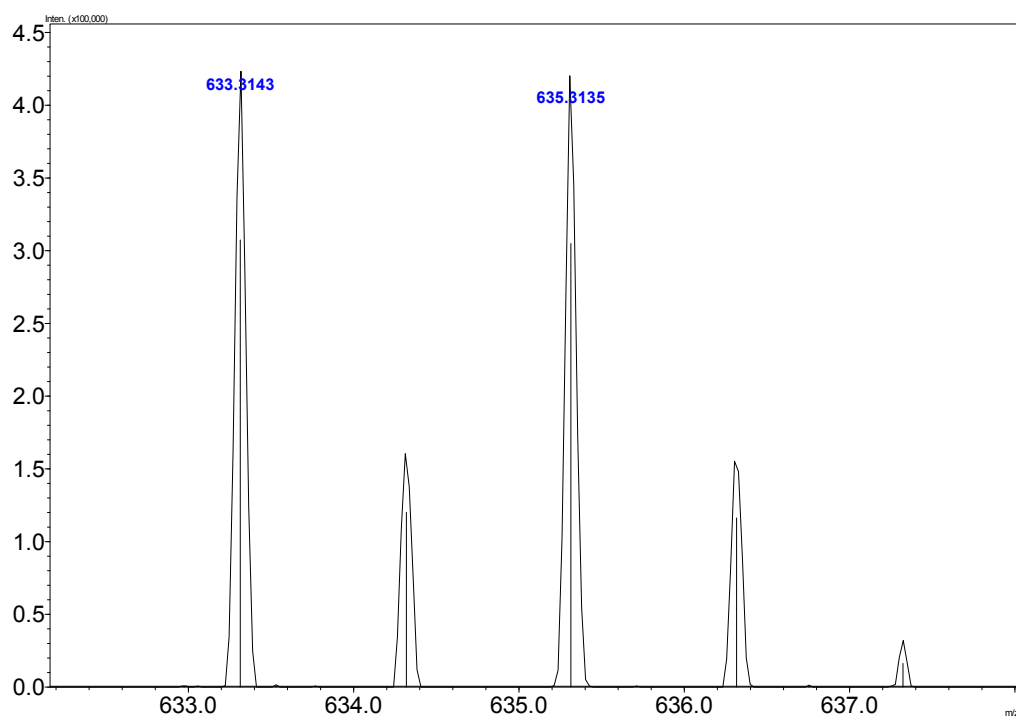

(3)  $^1\text{H}$  NMR spectrum of **Br-C4-GA-CO<sub>2</sub>Me** (400 MHz,  $\text{CDCl}_3$ )

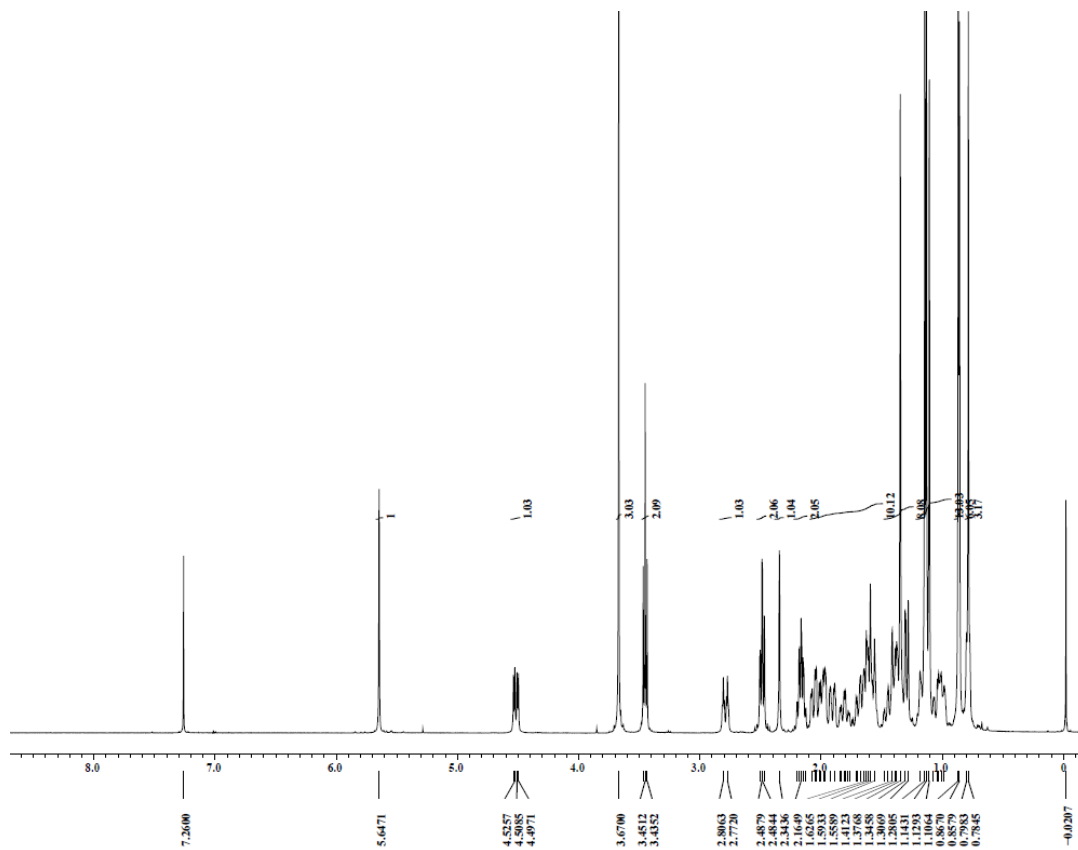

(4)  $^{13}\text{C}$  NMR spectrum of **Br-C4-GA-CO<sub>2</sub>Me** (100 MHz,  $\text{CDCl}_3$ )

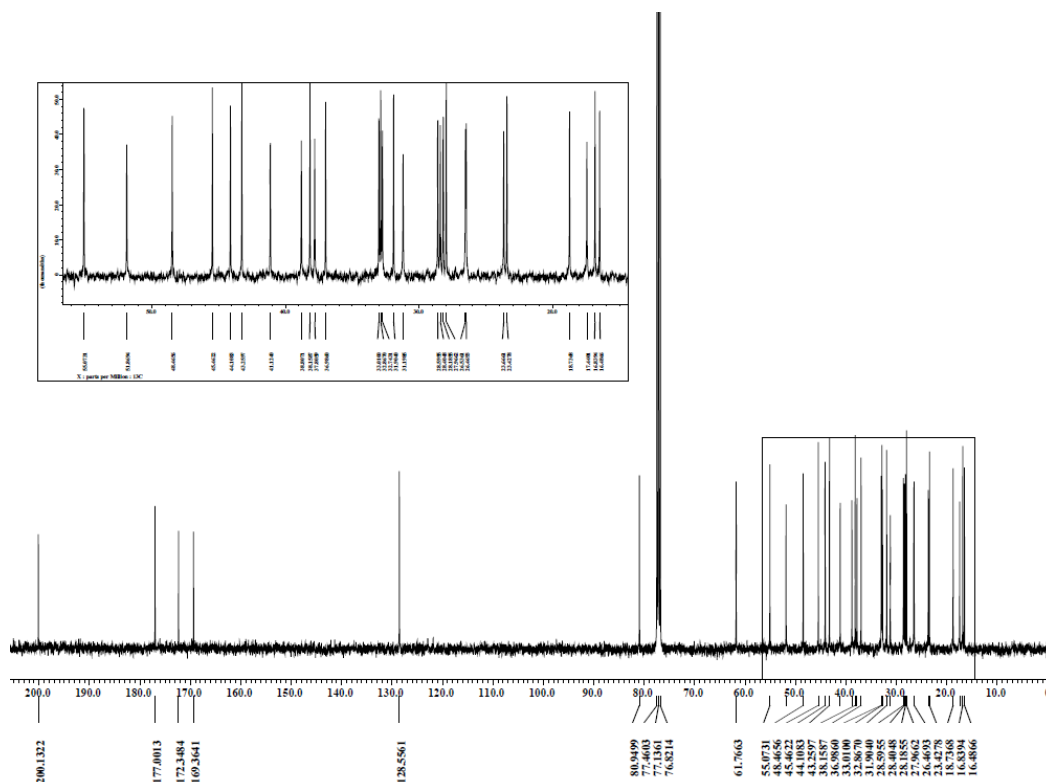

## C4-MGP

### (1) ESI-MS (+) spectrum of C4-MGP

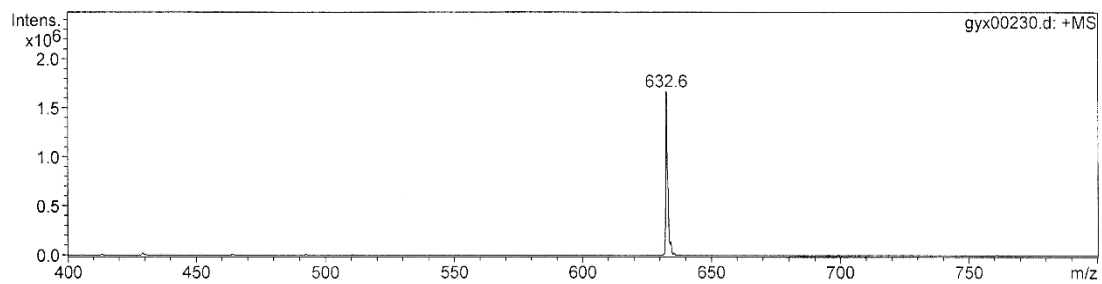

### (2) HRMS (ESI) spectrum of C4-MGP

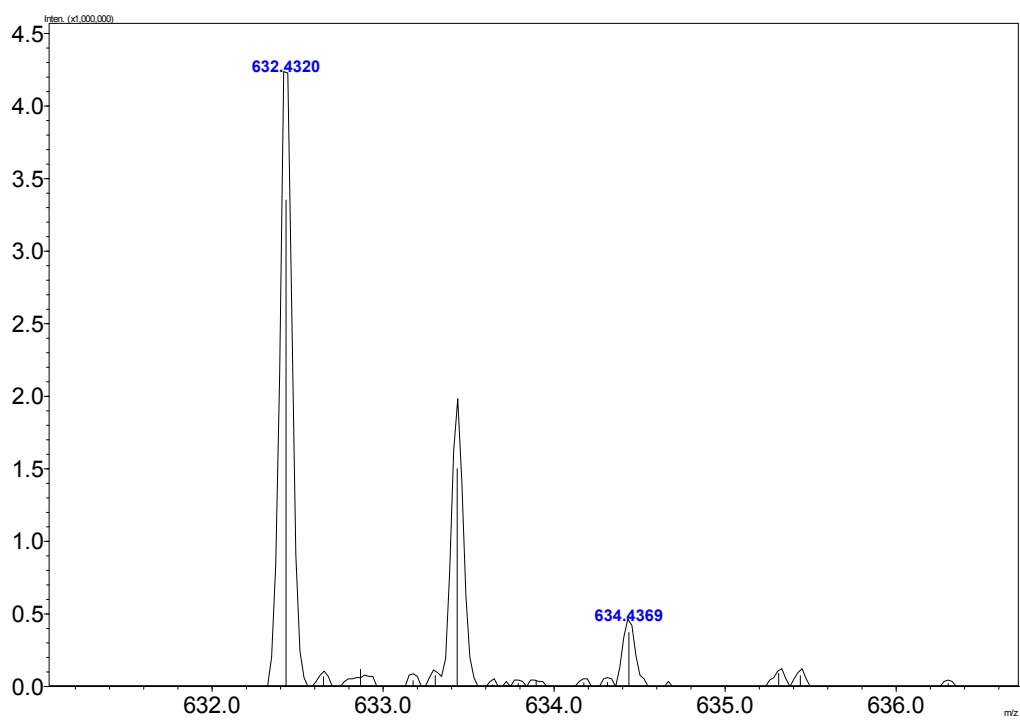

### (3) <sup>1</sup>H NMR spectrum of C4-MGP (400 MHz, DMSO-*d*<sub>6</sub>)



## Synthesis of C4-MOP

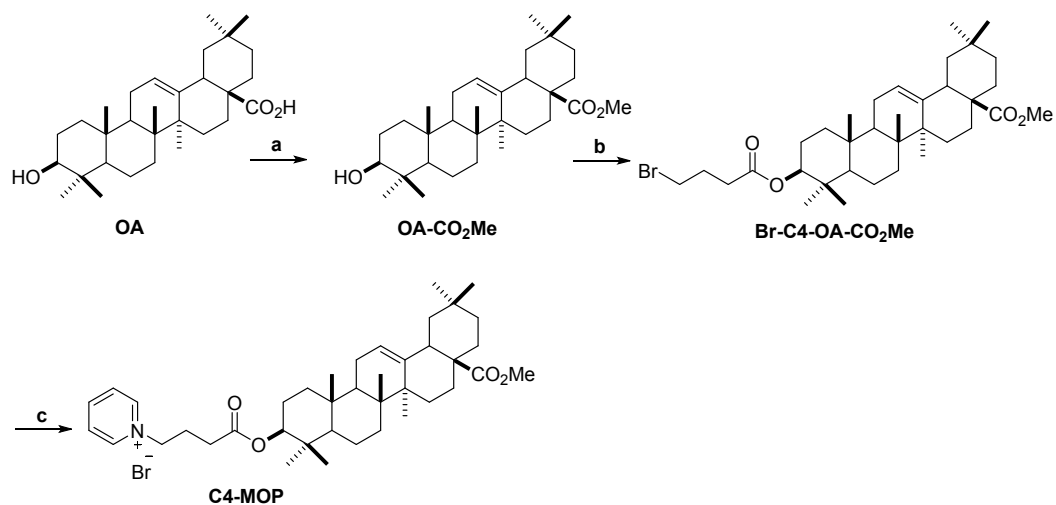

**Scheme S4** (a) CH<sub>3</sub>I, DMF, r.t., 20 h, 97 %; (b) 4-Bromobutyric acid, DCC, DMAP, dry DCM, r.t., 20 h, 58 %; (c) Pyridine, r.t., 12 h, 60 %.

## OA-CO<sub>2</sub>Me

(1) ESI-MS (+) spectrum of OA-CO<sub>2</sub>Me

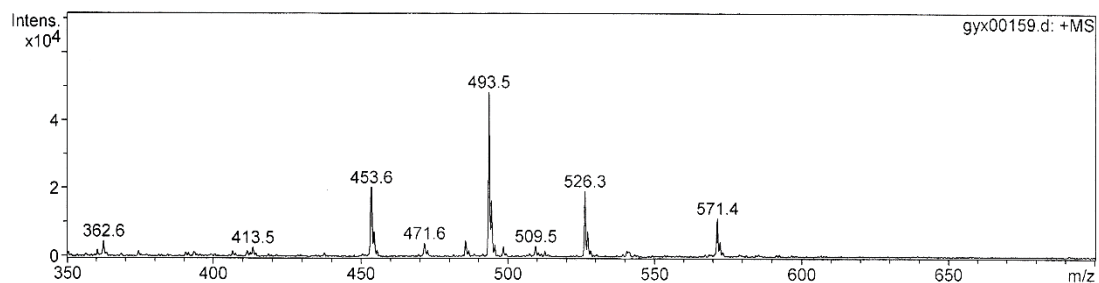

(2) HRMS (ESI) spectrum of OA-CO<sub>2</sub>Me

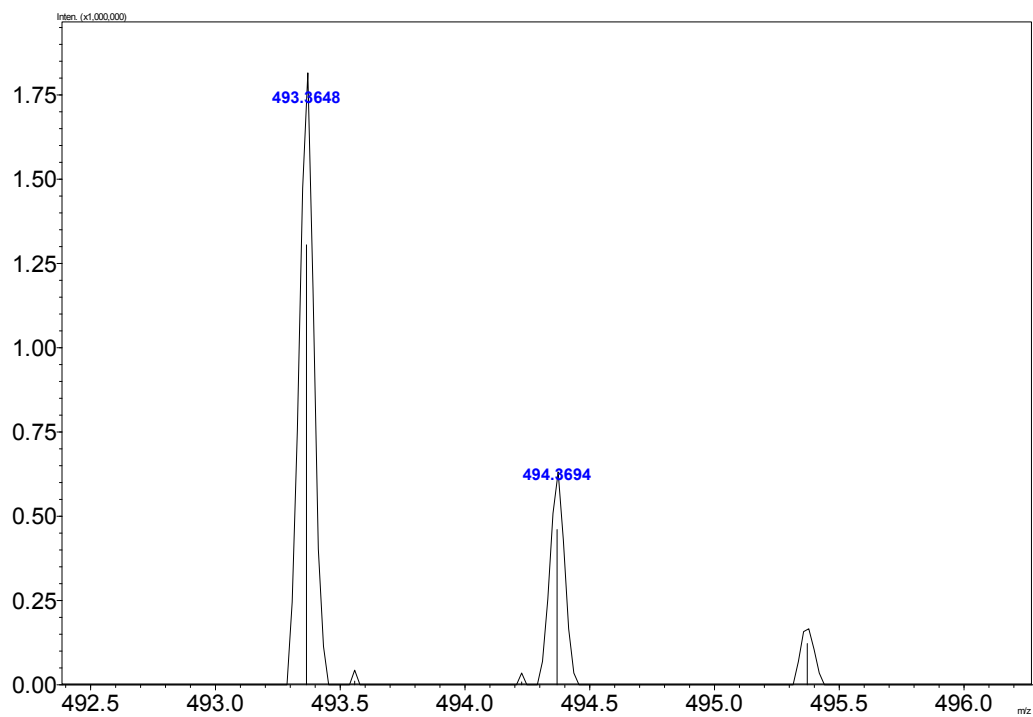

(3)  $^1\text{H}$  NMR spectrum of **OA-CO<sub>2</sub>Me** (300 MHz, CDCl<sub>3</sub>)

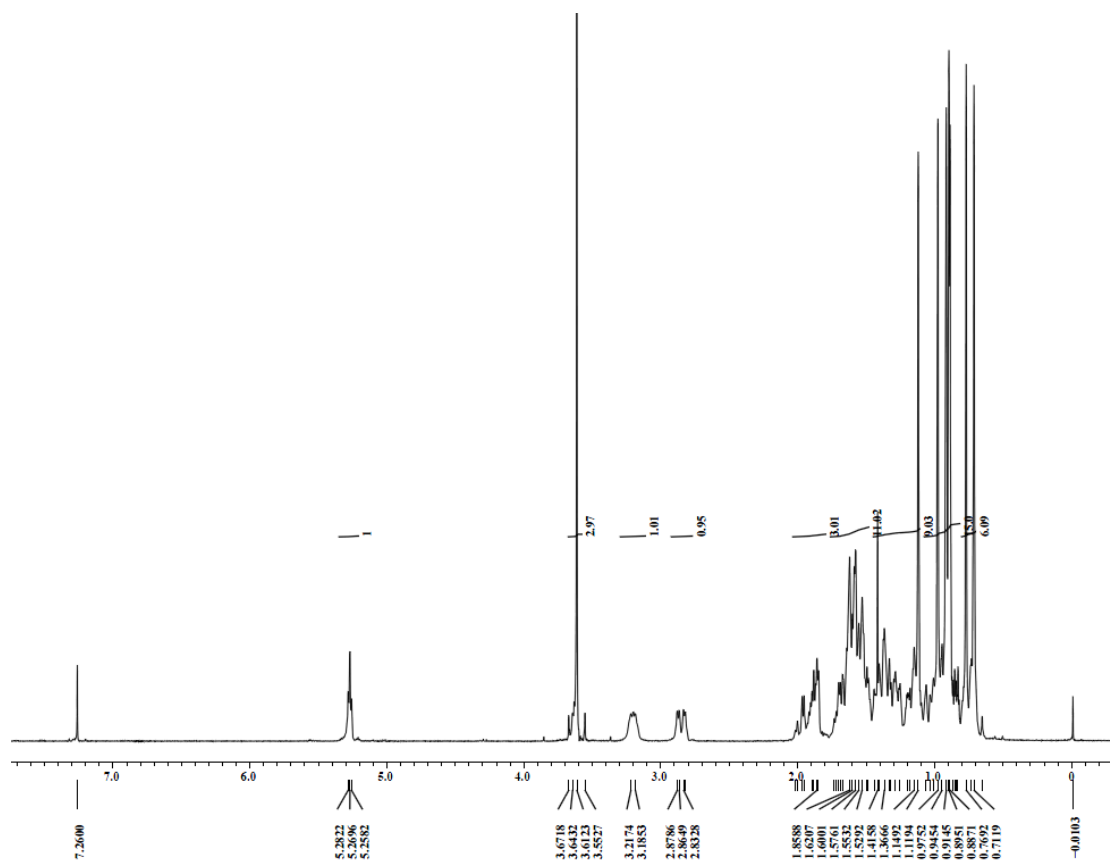



(4)  $^{13}\text{C}$  NMR spectrum of **OA-CO<sub>2</sub>Me** (75 MHz,  $\text{CDCl}_3$ )

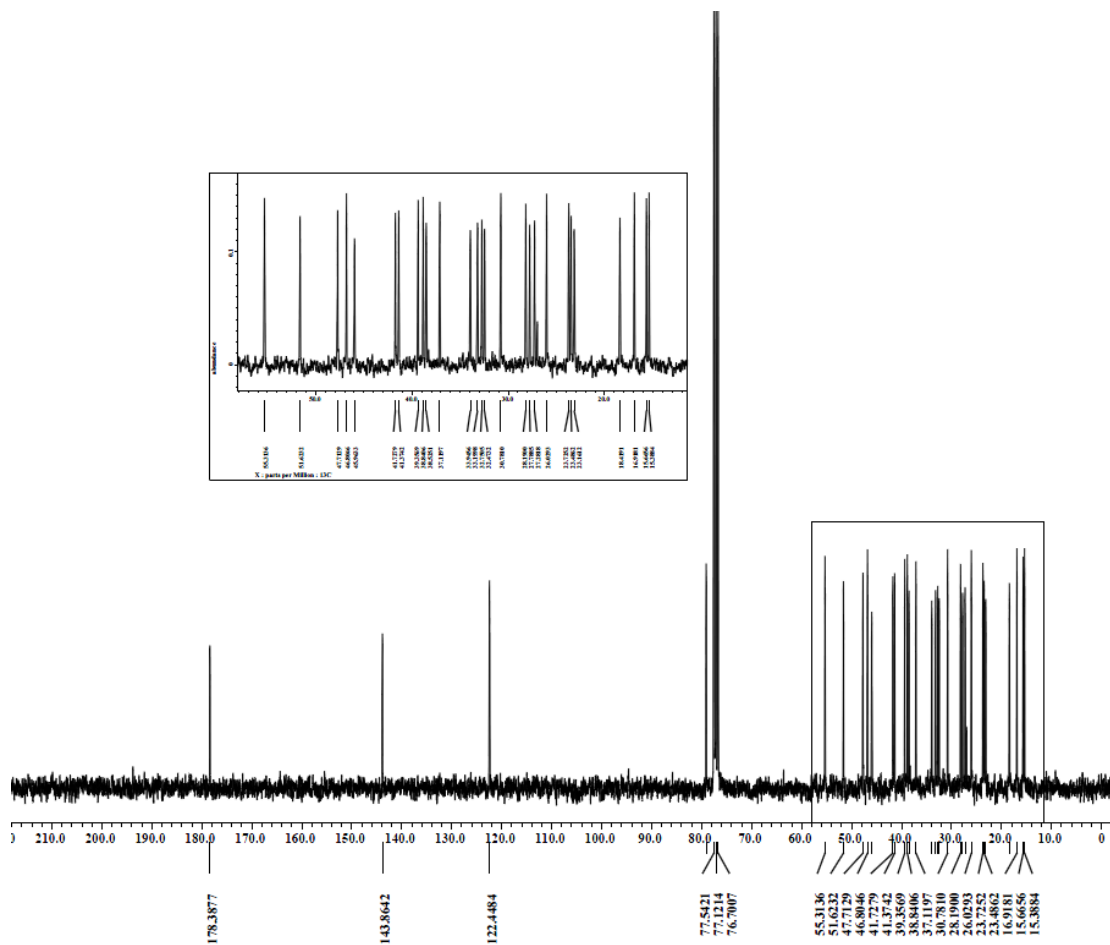

**Br-C4-OA-CO<sub>2</sub>Me**

(1) ESI-MS (+) spectrum of **Br-C4-OA-CO<sub>2</sub>Me**

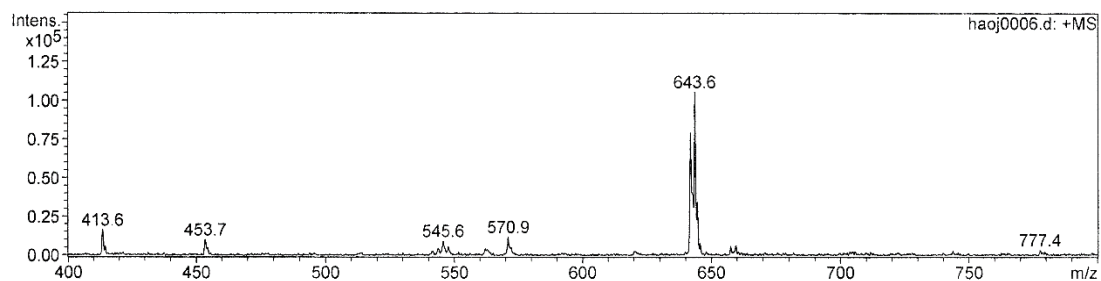

(2) HRMS (ESI) spectrum of **Br-C4-OA-CO<sub>2</sub>Me**

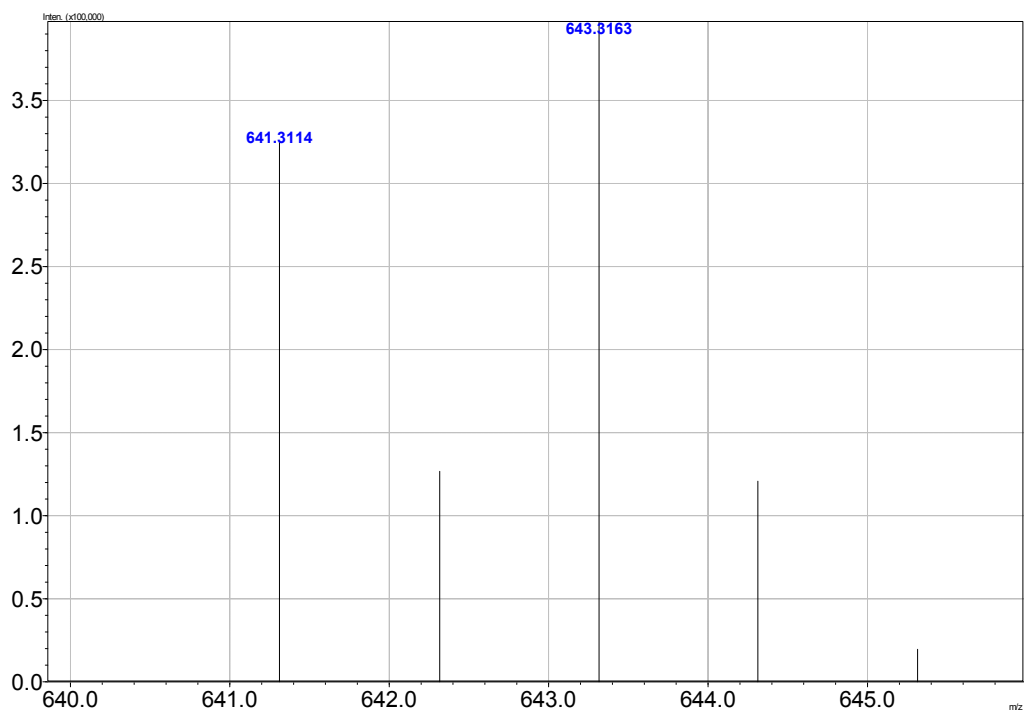

(3) <sup>1</sup>H NMR spectrum of **Br-C4-OA-CO<sub>2</sub>Me** (400 MHz, CDCl<sub>3</sub>)

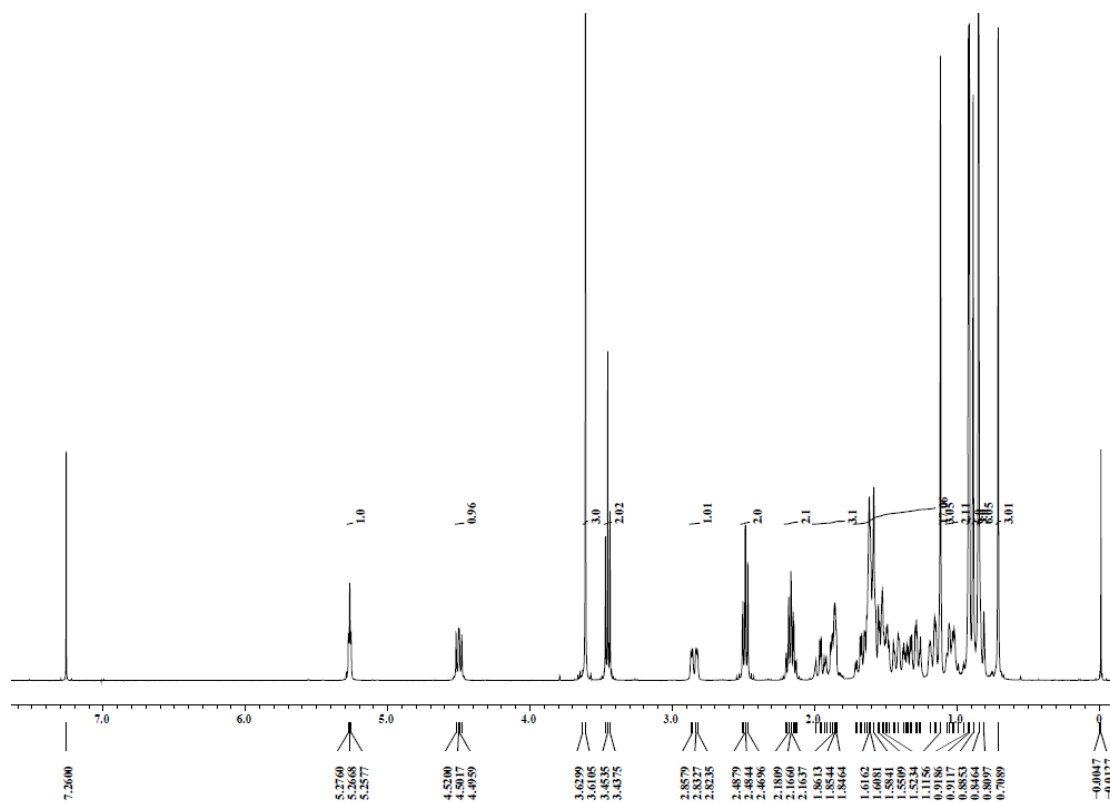

(4)  $^{13}\text{C}$  NMR spectrum of **Br-C4-OA-CO<sub>2</sub>Me** (100 MHz,  $\text{CDCl}_3$ )

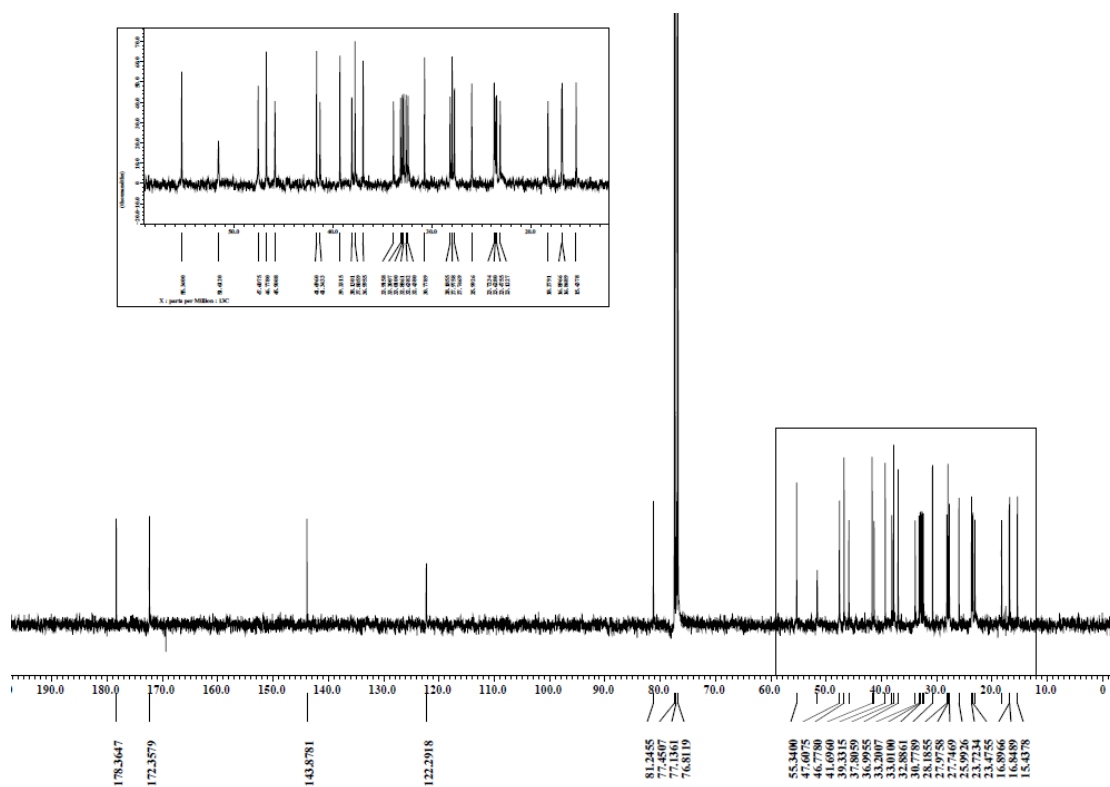

## C4-MOP

(1) ESI-MS (+) spectrum of **C4-MOP**

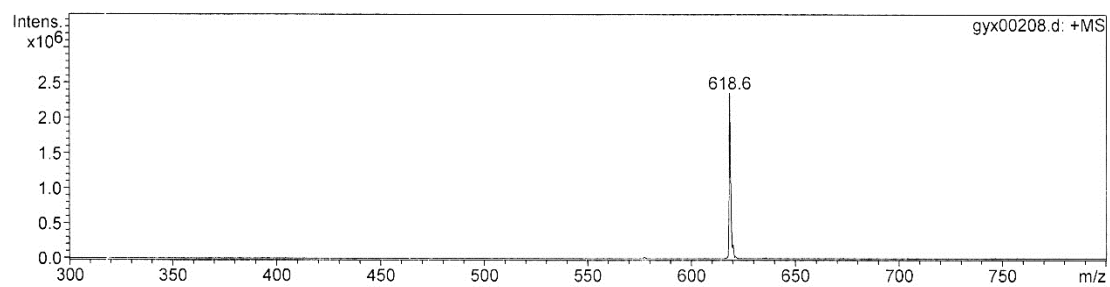

(2) HRMS (ESI) spectrum of **C4-MOP**

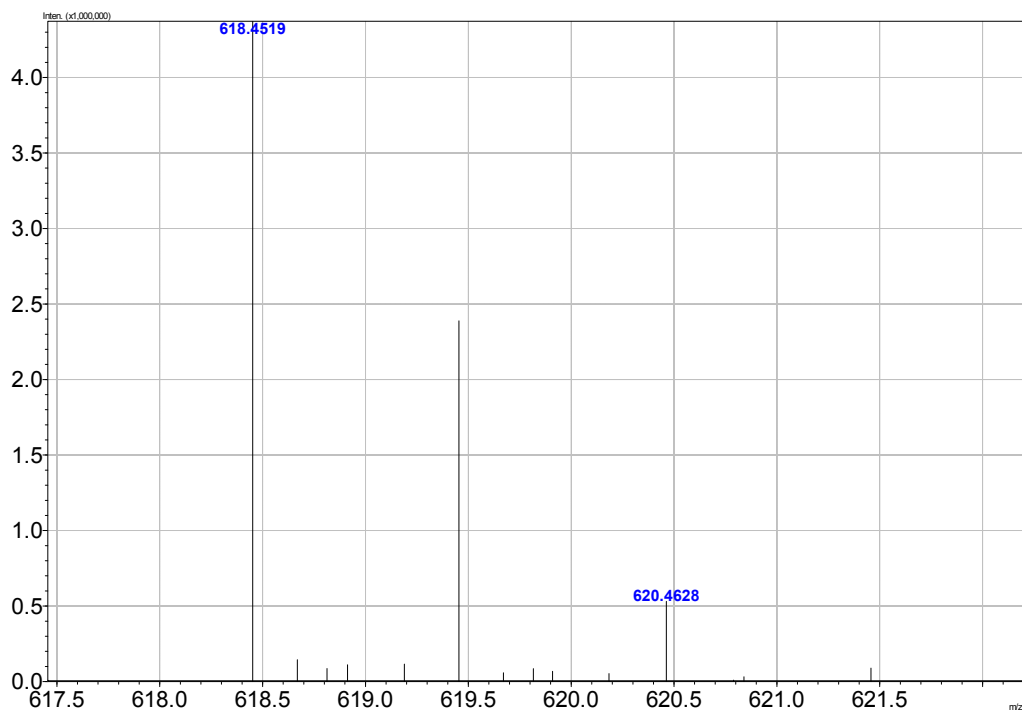

(3)  $^1\text{H}$  NMR spectrum of **C4-MOP** (400 MHz,  $\text{DMSO-}d_6$ )

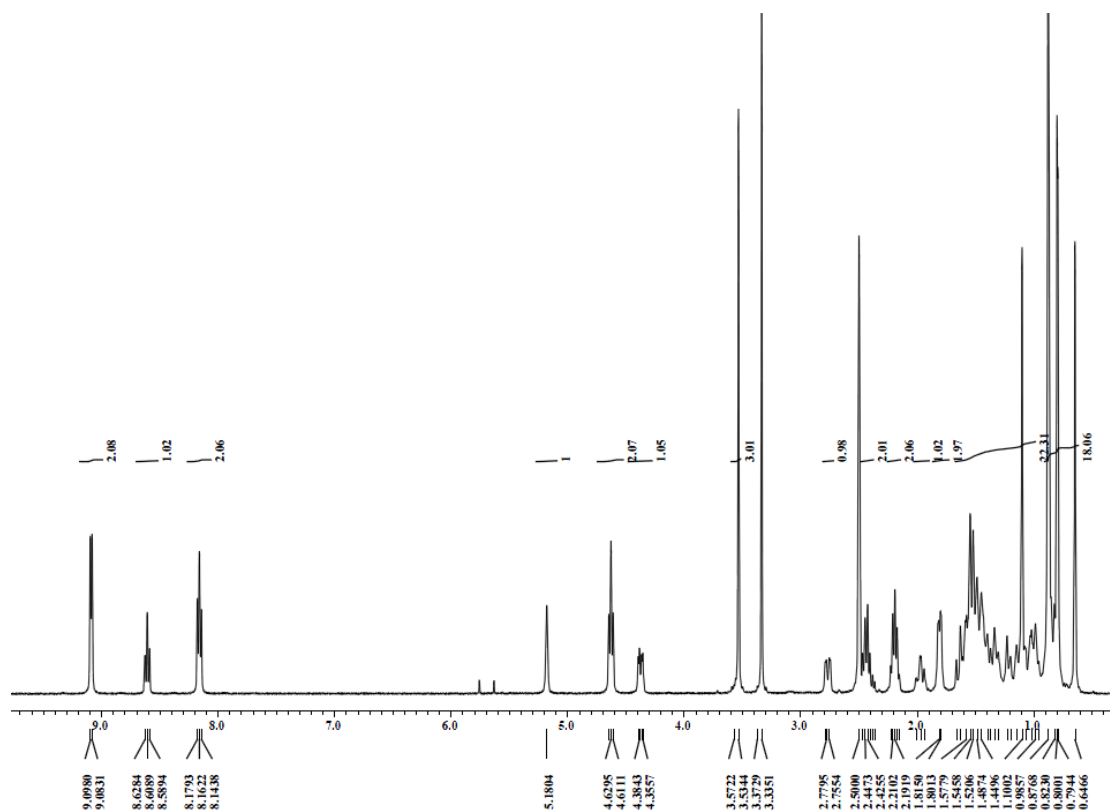

(4)  $^{13}\text{C}$  NMR spectrum of **C4-MOP** (100 MHz,  $\text{CDCl}_3$ )

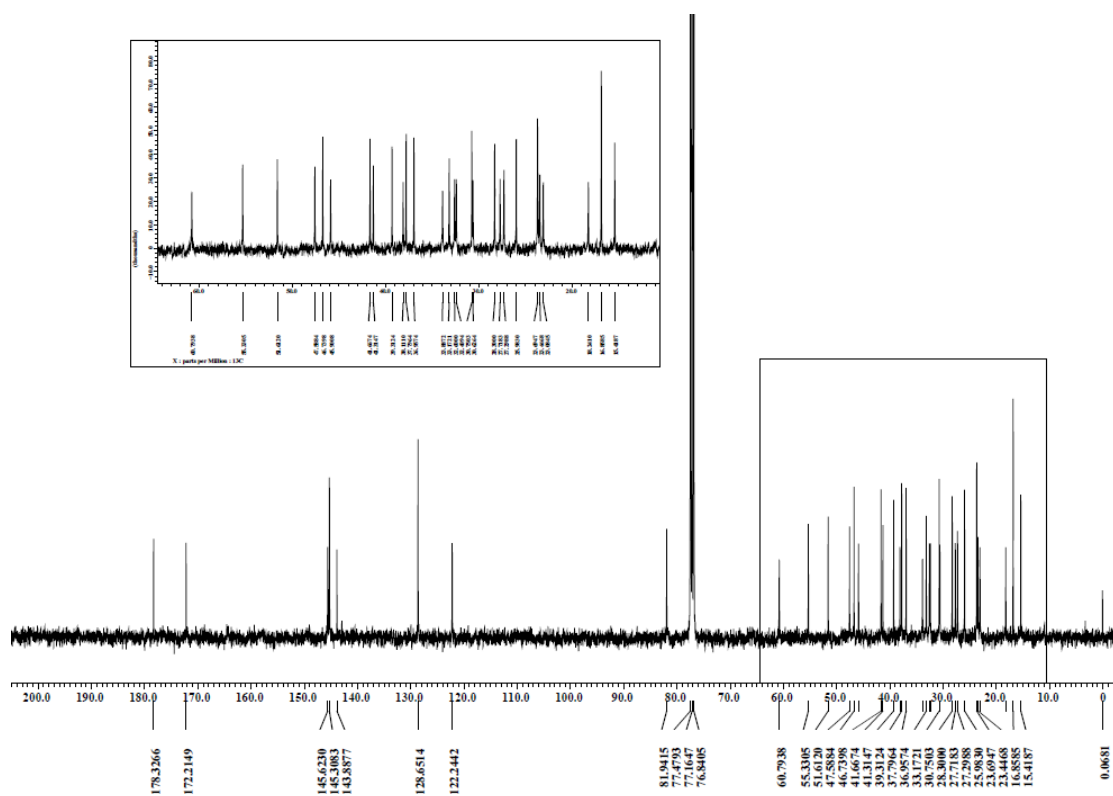

Supplement: c5nr03699b1.pdf [file c5nr03699b1.pdf]
